# Supplementary material for: Palmitic Acid-Induced miR-429-3p Impairs Myoblast Differentiation by Downregulating CFL2
Source: MDPI journal article supplement (doi:10.3390/ijms222010972), 2021-10-11
Supplement: s1 [file s1]

Table S1. Oligonucleotide sequences for transfection

| Gene                | Primer sequence (5'-3')  |
|---------------------|--------------------------|
| scRNA (control RNA) | UGGAAGACUAGUGAUUUUGUUGUU |
| siCFL2              | GCUCUAAAGAUGCCAUAUAAUU   |
| miR-429-3p          | UAAUACUGUCUGGUAACCGU     |
| antimiR-429         | Genolution               |

Table S2. Primer lists and PCR conditions for *q* RT-PCR, RT-PCR and cloning

(A) Mouse primer lists for *q* RT-PCR and RT-PCR

| Gene                   | Primer sequence (5'-3') |                                    | Product size | Annealing Temperature | Concentration |        | Cycle |
|------------------------|-------------------------|------------------------------------|--------------|-----------------------|---------------|--------|-------|
|                        |                         |                                    |              |                       | cDNA          | Primer |       |
| miR-429                | F.P                     | TAATACTGTCTGGTAAAACCGT             | 90           | 55                    | 2 ng/μl       | 0.5 μM | 40    |
| miRNA universal Primer | R.P                     | miScript universal primer (Qiagen) |              |                       |               |        |       |
| U6                     | F.P                     | CTCGCTTCGGCAGCACA                  | 94           |                       |               |        |       |
|                        | R.P                     | AACGCTTCACGAATTTCGCT               |              |                       |               |        |       |
| β-Actin                | F.P                     | TCACCCACACTGTGCCATCTACGA           | 348          | 58                    |               |        |       |
|                        | R.P                     | GGATGCCACAGGATTCATACCCA            |              |                       |               |        |       |
| CFL2                   | F.P                     | CCGACCCCTCCTTCTTCG                 | 100          | 58                    |               |        |       |
|                        | R.P                     | GTAACTCCAGATGCCATAGTG              |              |                       |               |        |       |
| Ccmd1                  | F.P                     | ACCAATCTCCTCAACGACCG               | 228          | 58                    |               |        |       |
|                        | R.P                     | ACGGAAGGGAAGAGAAGGG                |              |                       |               |        |       |
| Ccnb1                  | F.P                     | GAGCTATCCTCATTGACTGG               | 125          | 58                    |               |        |       |
|                        | R.P                     | CATCTTCTTGGGCACACAAC               |              |                       |               |        |       |
| PCNA                   | F.P                     | GAACCTGCAGCATGGACTC                | 201          | 58                    |               |        |       |
|                        | R.P                     | GGTGTCTGCATTATCTTCAGCCC            |              |                       |               |        |       |

(B) Primer lists for wild-type and mutant 3'UTR cloning

| Gene                     | Primer sequence (5'-3') |                               | Product size | Annealing Temperature | Concentration |        | Cycle |
|--------------------------|-------------------------|-------------------------------|--------------|-----------------------|---------------|--------|-------|
|                          |                         |                               |              |                       | cDNA          | Primer |       |
| Hsa-CFL2-3'UTR wild type | F.P                     | ATTATCCACTGGTCAGATGGTC        | 238          | 58                    | 2 ng/μl       | 0.5 μM | 35    |
|                          | R.P                     | AGGTACTAGGATAAGTTGATGACACAG   |              |                       |               |        |       |
| Hsa-CFL2-3'UTR mutation  | F.P                     | ATTATCCACTGGTCAGATGGTC        | 56           |                       |               |        |       |
|                          | R.P                     | CAAGTGCCAACTATAAAATATATCTGAAA |              |                       |               |        |       |
|                          | F.P                     | TTTCAGATATATTATAGTTGGCACTTG   | 210          |                       |               |        |       |
|                          | R.P                     | AGGTACTAGGATAAGTTGATGACACAG   |              |                       |               |        |       |

Table S3. Antibodies list

| Antibody                              | Type       | Targeted species | Manufacturer                                         | Cat. No.   | Dilution ratio* |
|---------------------------------------|------------|------------------|------------------------------------------------------|------------|-----------------|
| CFL2                                  | Polyclonal | Rabbit           | Lifespan Biosciences, Seattle, WT, USA               | LS-C409553 | 1:2,000         |
| MyHC                                  | Monoclonal | Mouse            | DSHB, Iowa, IA, USA                                  | MF20       | 1:1,000         |
| MyoD                                  | Monoclonal | Mouse            | Santa Cruz Biotechnology, Dallas, TX, USA            | sc-377460  | 1:1,000         |
| MyoG                                  | Monoclonal | Mouse            | Santa Cruz Biotechnology, Dallas, TX, USA            | sc-12732   | 1:1,000         |
| YAP                                   | Monoclonal | Rabbit           | Cell Signaling Technology, Danvers, MA, USA          | 14074S     | 1:10,000        |
| p-YAP                                 | Polyclonal | Rabbit           | Cell Signaling Technology, Danvers, MA, USA          | 4911S      | 1:10,000        |
| Lamin B2                              | Monoclonal | Rabbit           | Abcam, Cambridge, United Kingdom                     | ab151735   | 1:2,500         |
| $\alpha$ -Tubulin                     | Monoclonal | Mouse            | DSHB, Iowa, IA, USA                                  | 12G10      | 1:2,000         |
| $\beta$ -actin                        | Monoclonal | Rabbit           | Sigma-Aldrich Chemical, St. Louis USA                | A2066      | 1:10,000        |
| Antibodies HRP-linked anti-rabbit IgG |            |                  | Cell Signaling Technology, Danvers, MA, USA          | #7074      | 1:10,000        |
| Goat anti-mouse(H+L)                  |            |                  | Invitrogen, Thermofisher Scientific, Waltham, MA USA | #32430     | 1:2,000         |

\*All blots were visualized using a Femto reagent (Thermofisher Scientific).
